# Supplementary material for: Aminative rearrangement of 2-alkoxy-3,4-dihydro-2H-pyrans: a novel stereocontrolled route to substituted pyrrolidinesElectronic supplementary information (ESI) available: experimental details and characterisation data for all new compounds. See http://www.rsc.org/suppdata/cc/b3/b316554j/
Source: Royal Society of Chemistry journal article supplement (doi:10.1039/b316554j), 2004-01-01
Supplement: b316554j.doc [file b316554j.doc]

Supplementary Information

Aminative Rearrangement of 2-Alkoxy-3,4-dihydro-2*H*-pyrans: A Novel Stereocontrolled Route to Substituted Pyrrolidines

Alan Armstrong,**a* Graham R. Cumming*a* and Kurt Pike*b*

a Department of Chemistry, Imperial College London, South Kensington, London SW7 2AZ, UK. Fax: +44 (0)20 7594 5804; Tel: +44 (0)20 7594 5876; E-mail:A.Armstrong@imperial.ac.uk

b CVGI Chemistry, AstraZeneca, Mereside, Alderley Park, Macclesfield, Cheshire SK10 4TG, UK. Fax: +44 (0)1625 513624; Tel: +44 (0)1625 512733; E-mail: kurt.pike@astrazeneca.com

General Information

All reactions were carried out under a positive pressure of N2. Acetonitrile and dichloromethane were freshly distilled from CaH2 before use. 2-Methoxy-3,4-dihydro-2*H*-pyran was supplied by Sigma-Aldrich Ltd and distilled before use; other alkoxy-dihydropyrans were prepared according to the general Yb(FOD)3-catalysed procedure of Danishefsky *et al.*1 at 55 or 100 °C. Chloramine-T was dried under vacuum at 80 °C before use, as recommended by Sharpless *et al.*2 (**caution** – Chloramine-T is potentially explosive when heated and drying should be conducted with appropriate precautions). PhINTs was prepared according to the procedure of Page *et al.*3 Other commercial reagents were used as supplied. NMR analyses were performed on Bruker AC250, DRX400 or AM500 instruments in CDCl3; chemical shifts are quoted in ppm relative to TMS, referenced to residual CHCl3 (δH=7.26) or CDCl3 (δC=77.0 ppm) as appropriate, with coupling constants quoted in Hz. Infrared spectra were recorded on a Mattson Satellite FTIR spectrometer. Mass spectrometry was carried out by CI using ammonia on Micromass Platform II or Autospec-Q instruments.

Method A – Cu(I) catalysed aziridination:

To a stirred mixture of PhI=NTs (1.0-1.25 eq) and 4Å molecular sieves (0.3 g/mmol) in MeCN (3 ml/mmol) at 0 °C was added Cu(MeCN)4PF6 (0.1 eq), followed by a solution of the substrate in MeCN (2 ml/mmol). Following consumption of PhI=NTs (0.5-1 h), the green mixture was passed through a 2.5 cm plug of Et3N-washed silica, flushing with EtOAc (100 ml). The solution was concentrated and the product isolated by chromatography on Et3N-washed silica or the crude mixture reduced directly with BF3.Et2O/Et3SiH in CH2Cl2.

Method B – NBS catalysed aziridination:

To a stirred solution of the dihydropyran in MeCN (20 ml/mmol) at room temperature was added NBS (0.2 eq) and dried Chloramine-T (1.2-3 eq). After 1 h the heterogeneous reaction mixture was passed through a 2.5 cm plug of Et3N-washed silica, flushing with EtOAc (100 ml). The solution was concentrated and the product isolated by chromatography on Et3N-washed silica or the crude mixture reduced directly with BF3.Et2O/Et3SiH in CH2Cl2.

Method C – BF3.Et2O catalysed reduction:

To a stirred solution of the aminal in CH2Cl2 (2 ml) at –78 °C was added triethylsilane (2-4 eq) and BF3.Et2O (2-3 eq). The mixture was allowed to warm to 0 °C over 2 h then treated with sat. aq. sodium bicarbonate (10 ml), diluted with water (10 ml) and extracted with dichloromethane (4 x 10 ml). The combined organic portions were washed with brine (10 ml), dried over Na2SO4 and concentrated to afford a crude mixture, which was chromatographed on silica to afford the reduced pyrrolidine.

Method D – BF3.Et2O catalysed allylation:

To a stirred solution of the aminal in CH2Cl2 (2 ml) at –78 °C was added allyltrimethylsilane (2 eq) and BF3.Et2O (2 eq). The mixture was allowed to warm to 0 °C over 2 h then treated with sat. aq. sodium bicarbonate (10 ml), diluted with water (10 ml) and extracted with dichloromethane (4 x 10 ml). The combined organic portions were washed with brine (10 ml), dried over Na2SO4 and concentrated to afford a crude mixture, which was chromatographed on silica to afford the allylated pyrrolidine.

5-Methoxy-1-tosyl-pyrrolidine-2-carbaldehyde (3)

Treatment of the dihydropyran using **Method A** (at 2 x dilution, without molecular sieves) followed by chromatography on silica first with ether (Rf 0.6) and then with 10% EtOAc/CH2Cl2 (Rf 0.7) gave **3** (68 mg, 48%) as a colourless oil in a variable mixture of diastereoisomers, epimerised entirely to the *cis* isomer shown by stirring with silica, treatment with CSA or prolonged standing in CDCl3.

Treatment following **Method B** and chromatography on silica with ether gave **3** (0.22 g, 79%) as a colourless oil, again as a mixture of diastereoisomers.

*2,5-*cis *isomer*; νmax/cm-12945, 1736, 1349, 1162, 1081; δH (400 MHz, CDCl3) 9.55 (1H, d, *J*2.6, CHO), 7.71-7.67 (2H, m, *o*-ArH), 7.35-7.32 (2H, m, *m*-ArH), 5.12 (1H, d, *J*4.8, CHOMe), 3.80 (1H, td, *J*8.8, 2.6, CHCHO), 3.48 (3H, s, OCH3), 2.44 (3H, s, ArCH3), 2.15-2.04 (1H, m, CH2CHCHO), 1.97 (1H, dtd, *J*12.8, 8.0, 1.1, CH2CHCHO), 1.88 (1H, dd, *J*12.8, 7.0, CH2CHOMe), 1.24 (1H, dtd, *J*12.8, 8.0, 4.8, CH2CHOMe); δC (63 MHz, CDCl3) 200.0 (CH), 144.2 (C), 134.9 (C), 130.1 (CH), 127.4 (CH), 92.8 (CH), 66.6 (CH), 55.4 (CH3), 32.6 (CH2), 25.1 (CH2), 21.6 (CH3); *m/z* (CI) 301 (M+NH4)+, 252 (M-OMe)+; *m/z* calcd. for C13H21N2O4S (M+NH4)+, 301.1222; found, 301.1230.

*Selected data for 2,5-*trans *isomer*; δH (250 MHz, CDCl3) 9.72 (1H, d, *J*3.0, CHO), 5.33 (1H, d, *J*4.0, CHOMe), 3.28 (3H, s, OCH3), 2.42 (3H, s, ArCH3).

Structure of 2,5-*cis* isomer assigned by NOESY; key correlations shown below:

2,3-*trans*-1-[3-Isopropyl-1-tosyl-pyrrolidin-2-yl]-ethanone (5)

The dihydropyran was treated using **Method B** to afford the aminal (64%) as a single diastereoisomer, chromatographed on silica using 25% EtOAc/petrol (Rf 0.5). Reduction following **Method C** and chromatography on silica with 25% EtOAc/petrol (Rf 0.4) gave **5** (70 mg, 91%) as a colourless oil; νmax/cm-1 2963, 1715, 1346, 1163, 1095; δH (250 MHz, CDCl3) 7.73-7.66 (2H, m, *o*‑ArH), 7.35-7.29 (2H, m, *m*‑ArH), 3.64 (1H, d, *J*6.7, CHC(O)CH3), 3.49 (1H, dt, *J*10.7, 7.3, NCH2), 3.35 (1H, ddd, *J*10.7, 7.7, 5.2, NCH2), 2.43 (3H, s, ArCH3), 2.32 (3H, s, C(O)CH3), 2.01-1.90 (1H, m, CHCH(CH3)2), 1.89-1.74 (1H, m, NCH2CH2), 1.45-1.22 (2H, m, NCH2CH2 and CH(CH3)2), 0.78 (3H, d, *J*6.7, CH(CH3)2), 0.64 (3H, d, *J*6.7, CH(CH3)2); δC (63 MHz, CDCl3) 208.5 (C), 144.0 (C), 133.8 (C), 129.8 (CH), 127.6 (CH), 70.6 (CH), 49.8 (CH), 48.6 (CH2), 29.0 (CH), 27.0 (CH2), 25.7 (CH3), 21.6 (CH3), 21.2 (CH3), 18.5 (CH3); *m/z* (CI) 327 (M+NH4)+, 310 (M+H)+; *m/z* calcd. for C16H24NO3S (M+H)+, 310.1477; found, 310.1465.

Stereochemistry was assigned at the aminal stage by NOESY; key correlations shown below:

2,3-*cis*-1-[3-Isopropyl-1-tosyl-pyrrolidin-2-yl]-ethanone (6)

The dihydropyran was treated using **Method A** to afford, surprisingly, the toluenesulfonamide adduct (52%) as a variable mixture of isomers at the aminal centre, chromatographed on silica using 25% EtOAc/petrol (Rf 0.2). Reduction following **Method C** and subsequent chromatography on silica with 25% EtOAc/petrol (Rf 0.4) gave **6** (64 mg, 98%) as a white solid, which could be recrystallised from hexane (m.p. 102-103 °C); νmax/cm-1 (nujol mull) 1712, 1344, 1159, 1032, 818; δH (250 MHz, CDCl3) 7.73-7.66 (2H, m, *o*‑ArH), 7.32 (2H, br d, *J*7.9, *m*‑ArH), 4.06 (1H, d, *J*8.5, CHC(O)CH3), 3.77-3.68 (1H, m, NCH2), 3.10 (1H, ddd, *J*10.7, 9.1, 6.7, NCH2), 2.43 (3H, s, ArCH3), 2.28 (3H, s, C(O)CH3), 2.04-1.72 (2H, m, alkyl-H), 1.65-1.52 (1H, m, alkyl-H), 1.45-1.28 (1H, m, alkyl-H), 0.91 (3H, d, *J*6.1, CH(CH3)2), 0.81 (3H, d, *J*6.4, CH(CH3)2); δC (63 MHz, CDCl3) 208.0 (C), 143.8 (C), 134.2 (C), 129.8 (CH), 127.4 (CH), 68.3 (CH), 51.8 (CH), 48.0 (CH2), 29.4 (CH3), 29.2 (CH2), 28.2 (CH), 22.1 (CH3), 21.53 (CH3), 21.49 (CH3); *m/z* (CI) 327 (M+NH4)+, 310 (M+H)+; *m/z* calcd. for C16H24NO3S (M+H)+, 310.1477; found, 310.1486.

The structure of **6** was confirmed by X-ray crystallography (see p. S9).

1-[3-Benzyloxymethyl-5-ethoxy-1-tosyl-pyrrolidin-2-yl]-ethanone (Table 1, Entry 1)

Treatment of the dihydropyran using **Method A** followed by chromatography on silica using 25% EtOAc/petrol afforded the 2,3-*trans*-2,5-*cis* isomer (Rf 0.40, 24 mg, 11%) and the 2,3-*cis* isomer (Rf 0.35, 92 mg, 42%).

Use of **Method B** and subsequent purification gave the 2,3-*trans*-2,5-*cis* isomer (75 mg, 35%) and the 2,3-*cis* isomer (34 mg, 16%).

*2,3-*trans*-2,5-*cis *isomer:* colourless oil; νmax/cm-1 2930, 1713, 1352, 1164, 1112, 666; δH (250 MHz, CDCl3) 7.65-7.59 (2H, m, *o*‑ArH from Ts), 7.35-7.28 (4H, m, ArH), 7.18-7.12 (3H, m, ArH), 5.11 (1H, d, *J*5.2, CHOEt), 4.38 (1H, d, *J*11.7, OCH2Ph, AB), 4.33 (1H, d, *J*11.7, OCH2Ph, AB), 4.05 (1H, dq, *J*9.8, 7.0, OCH2CH3), 3.77 (1H, d, *J*9.5, CHC(O)CH3), 3.63 (1H, dq, *J*9.8, 7.0, OCH2CH3), 3.41 (1H, dd, *J*9.8, 3.5, CH2OBn, ABX), 3.33 (1H, dd, *J*9.8, 4.9, CH2OBn, ABX), 2.72-2.56 (1H, m, BnOCH2CH), 2.37 (3H, s, ArCH3), 2.35 (3H, s, C(O)CH3), 1.87 (1H, dd, *J*12.6, 6.5, NCHCH2), 1.30-1.18 (1H, m, NCHCH2), 1.24 (3H, t, *J*7.0, OCH2CH3); δC (126 MHz, CDCl3) 209.3 (C), 144.2 (C), 138.3 (C), 134.9 (C), 130.0 (CH), 128.5 (CH), 127.81 (CH), 127.75 (CH), 127.6 (CH), 91.5 (CH), 73.3 (CH2), 69.3 (CH), 68.9 (CH2), 63.3 (CH2), 42.3 (CH), 36.1 (CH2), 25.3 (CH3), 21.7 (CH3), 15.0 (CH3); *m/z* (CI) 449 (M+NH4)+, 386 (M-OEt)+, 276 (M-Ts)+; *m/z* calcd. for C23H33N2O5S (M+NH4)+, 449.2110; found, 449.2107.

*2,3-*cis *isomer (2:1 mixture of isomers at aminal centre):* colourless oil; νmax/cm-1 2869, 1712, 1598, 1347, 1162, 1091, 670; δH (250 MHz, CDCl3) 7.81-7.74 (2Hminor isomer, m, *o*‑ArH from Ts), 7.72-7.66 (2Hmajor isomer, m, *o*‑ArH from Ts), 7.37-7.21 (7Hboth isomers, m, ArH), 5.42 (1Hminor isomer, d, *J*4.6, CHOEt), 5.21 (1Hmajor isomer, dd, *J*5.5, 1.2, CHOEt), 4.42-4.28 (2Hboth isomers, m, OCH2Ph), 4.14 (1Hminor isomer, d, *J*9.2, CHC(O)CH3), 4.08 (1Hmajor isomer, d, *J*8.2, CHC(O)CH3), 3.98 (1Hmajor isomer, dq, *J*9.8, 7.0, OCH2CH3), 3.76-3.30 (3Hmajor isomer, 4Hminor isomer, m, OCH2CH3 and CH2OBn), 2.72-2.59 (1Hmajor isomer, m, BnOCH2CH), 2.45-2.39 (3Hmajor isomer, 4Hminor isomer, m, ArCH3 and BnOCH2CH), 2.27 (3Hboth isomers, s, C(O)CH3), 2.20-1.49 (2Hboth isomers, m, NCHCH2), 1.28-1.08 (3Hboth isomers, m, OCH2CH3); δC (126 MHz, CDCl3) *major isomer only as decomposition occurs in solution*, 208.6 (C), 143.7 (C), 137.7 (C), 137.5 (C), 130.1 (CH), 129.4 (CH), 128.6 (CH), 128.2 (CH), 128.0 (CH), 90.5 (CH), 73.5 (CH2), 68.0 (CH2), 67.0 (CH), 64.1 (CH2), 41.4 (CH), 33.8 (CH2), 29.3 (CH3), 21.8 (CH3), 15.2 (CH3); *m/z* (CI) 449 (M+NH4)+, 386 (M-OEt)+; *m/z* calcd. for C23H33N2O5S (M+NH4)+, 449.2110; found, 449.2101.

The structure of the 2,3-*trans*-2,5-*cis* isomer was assigned by NOE-DIFF; key correlations shown below:

*Z*-1-[3-oct-5-enyl-1-tosyl-pyrrolidin-2-yl]-1-ethanone (Table 1, Entry 2)

Use of **Method A** gave a mixture of products unstable to purification; reduction of the crude mixture using **Method C** followed by chromatography on silica using 20% EtOAc/petrol (Rf 0.3) gave the pyrrolidine (86 mg, 46%) as an inseparable 3:1 (*cis:trans*) mixture of isomers.

Treatment of the dihydropyran using **Method B** gave a mixture of similarly unstable products; reduction of the crude mixture using **Method C** and subsequent purification gave the pyrrolidine (40 mg, 44%) as an inseparable 1:1.6 (*cis:trans*) mixture of isomers.

νmax/cm-1 (from 5.3:1 *cis:trans* mixture) 2931, 1712, 1347, 1164, 670; δH (500 MHz, CDCl3) 7.73-7.68 (2Hboth isomers, m, *o*‑ArH), 7.35-7.30 (2Hboth isomers, m, *m*-ArH), 5.38-5.31 (1Hboth isomers, m, CH=CH), 5.27-5.20 (1Hboth isomers, m, CH=CH), 3.98 (1Hcis isomer, d, *J*9.3, CHC(O)CH3), 3.72 (1Hcis isomer, ddd, *J*9.3, 7.8, 1.5, NCH2), 3.56-3.49 (1Htrans isomer, m, CHC(O)CH3), 3.50 (1Htrans isomer, d, *J*6.3, NCH2) 3.37 (1Htrans isomer, ddd, *J*10.8, 7.8, 5.2, NCH2), 3.10 (1Hcis isomer, ddd, *J*10.4, 9.3, 6.3, NCH2), 2.43 (3Hboth isomers, s, ArCH3), 2.34 (3Htrans isomer, s, C(O)CH3), 2.27 (3Hcis isomer, s, C(O)CH3), 2.05-1.88 (6Hboth isomers, m, alkyl-H), 1.75-0.80 (10Hboth isomers, m, alkyl-H); δC (63 MHz, CDCl3) *cis diastereoisomer* 208.5 (C), 143.8 (C), 133.7 (C), 131.9 (CH), 129.8 (CH), 128.6 (CH), 127.6 (CH), 69.2 (CH), 48.1 (CH2), 43.2 (CH), 30.5 (CH2), 29.4 (CH2), 29.2 (CH3), 27.7 (CH2), 26.8 (CH2), 21.5 (CH3), 20.5 (CH2), 14.3 (CH3), (1 x CH2 not seen); *trans diastereoisomer - selected data only* 208.3 (C), 144.0 (C), 133.8 (C), 73.0 (CH), 48.3 (CH2), 43.5 (CH), 32.3 (CH2), 30.6 (CH2), 29.7 (CH2), 25.8 (CH3); *m/z* (CI) 395 (M+NH4)+, 378 (M+H)+; *m/z* calcd. for C21H32NO3S (M+H)+, 378.2103; found, 378.2094.

3-*n*-Butyl-5-ethoxy-1-tosyl-pyrrolidine-2-carbaldehyde (Table 1, Entry 3)

Treatment of the dihydropyran using **Method A** followed by chromatography on silica using 25% EtOAc/petrol (Rf 0.4) gave the aminal (37 mg, 42%) as a colourless oil in a variable mixture of diastereoisomers.

Use of **Method B** and subsequent purification gave the aminal (76 mg, 43%) as a white powder and single diastereoisomer of undetermined stereochemistry.

*Single diastereoisomer (from Method B):* m.p. 52-54 °C; νmax/cm-1 2958, 1735, 1348, 1158, 671; δH (250 MHz, CDCl3) 9.43 (1H, s, CHO), 7.76-7.71 (2H, m, *o*-ArH), 7.30-7.24 (2H, m, *m*-ArH), 5.40 (1H, br d, *J*4.0, CHOEt), 3.74 (1H, dq, *J*9.4, 7.0, OCH2CH3), 3.54 (1H, dq, *J*9.4, 7.0, OCH2CH3), 2.41 (3H, s, ArCH3), 2.31-2.20 (1H, m, alkyl-CH2), 1.96-1.67 (5H, m, alkyl-CH2), 1.20-0.86 (4H, m, alkyl-CH2), 1.14 (3H, t, *J*7.0, OCH2CH3), 0.75-0.64 (3H, m, CH2CH2CH3); δC (63 MHz, CDCl3) 199.9 (CH), 143.6 (C), 139.4 (C), 129.4 (CH), 127.3 (CH), 92.3 (CH), 74.6 (C), 63.7 (CH2), 31.4 (CH2), 31.3 (CH2), 30.1 (CH2), 25.7 (CH2), 22.9 (CH2), 21.5 (CH3), 15.2 (CH3), 13.8 (CH3); *m/z* (CI) 371 (M+NH4)+, 308 (M‑OEt)+; *m/z* calcd. for C18H31N2O4S (M+NH4)+, 371.2005; found, 371.2012.

*1:1 mixture of diastereoisomers (from Method A):* δH (250 MHz, CDCl3) 9.79 (0.5H, s, CHO), 9.43 (0.5H, s, CHO), 7.88-7.82 (1H, m, *o*‑ArH), 7.76-7.71 (1H, m, *o*‑ArH), 7.30-7.23 (2H, m, *m*-ArH), 5.51-5.48 (0.5H, m, CHOEt), 5.40 (0.5H, br d, *J*4.0, CHOEt), 3.80-3.45 (2H, m, OCH2CH3), 2.42-2.40 (3H, m, ArCH3), 2.36-1.48 (6H, m, alkyl-CH2), 1.28-0.76 (7H, m, alkyl-CH2 and OCH2CH3), 0.75-0.60 (3H, m, CH2CH2CH3).

1-[3,3-Dimethyl-1-tosyl-pyrrolidin-2-yl]-ethanone (Table 1, Entry 4)

Treatment of the dihydropyran using **Method A** gave a mixture of isomers and probable hydrolysis products, reduced without further purification using **Method C**. Chromatography on silica using 25% EtOAc/petrol (Rf 0.35) gave the pyrrolidine (70 mg, 47%) as a colourless oil; νmax/cm-1 2964, 1710, 1345, 1162, 1096, 665; δH (250 MHz, CDCl3) 7.74-7.67 (2H, m, *o*‑ArH), 7.35-7.29 (2H, m, *m*-ArH), 3.66 (1H, ddd, *J*10.1, 7.6, 4.8, NCH2), 3.54 (1H, s, CHC(O)CH3), 3.28 (1H, ddd, *J*10.1, 7.6, 7.3, NCH2), 2.43 (3H, s, ArCH3), 2.30 (3H, s, C(O)CH3), 1.77 (1H, dt, *J*12.5, 7.6, NCH2CH2), 1.42 (1H, ddd, *J*12.5, 7.3, 4.8, NCH2CH2), 0.94 (3H, s, C(CH3)2), 0.73 (3H, s, C(CH3)2); δC (63 MHz, CDCl3) 208.8 (C), 143.9 (C), 133.5 (C), 129.7 (CH), 127.6 (CH), 75.9 (CH), 47.1 (CH2), 43.0 (C), 39.0 (CH2), 28.4 (CH3), 27.7 (CH3), 23.3 (CH3), 21.6 (CH3); *m/z* (CI) 313 (M+NH4)+, 296 (M+H)+, 252 (M-C(O)CH3)+; *m/z* calcd. for C15H22NO3S (M+H)+, 296.1320; found, 296.1313.

1-[5-*n*-Butoxy-3,3-dimethyl-1-tosyl-pyrrolidin-2-yl]-ethanone (Table 1, Entry 4)

Treatment of the dihydropyran using **Method B** and subsequent chromatography on silica using 25% EtOAc/petrol afforded the 2,5-*cis* isomer (Rf 0.4, 105 mg, 57%) and the 2,5-*trans* isomer (Rf 0.3, 27 mg, 15%); the *trans* isomer is entirely converted to the *cis* upon standing in CDCl3.

*2,5-*cis *isomer:* νmax/cm-1 2961, 1710, 1349, 1160, 1093, 662; δH (250 MHz, CDCl3) 7.69-7.63 (2H, m, *o*-ArH), 7.36-7.30 (2H, m, *m*-ArH), 5.11 (1H, d, *J*5.5, CHOBu), 4.00 (1H, dt, *J*9.5, 6.4, OCH2CH2), 3.53 (1H, dt, *J*9.5, 6.4, OCH2CH2), 3.47 (1H, s, CHC(O)CH3), 2.43 (3H, s, ArCH3), 2.35 (3H, s, C(O)CH3), 1.73 (1H, d, *J*12.8, NCHCH2), 1.67-1.52 (2H, m, alkyl-CH2), 1.50-1.31 (2H, m, alkyl-CH2), 1.21-1.12 (1H, m, NCHCH2), 1.10 (3H, s, C(CH3)2), 0.97-0.90 (6H, m, C(CH3)2 and CH2CH3); δC (63 MHz, CDCl3) 209.8 (C), 144.3 (C), 134.0 (C), 129.9 (CH), 127.6 (CH), 92.1 (CH), 77.3 (CH), 68.1 (CH2), 47.2 (CH2), 43.4 (C), 31.7 (CH2), 30.0 (CH3), 27.9 (CH3), 24.2 (CH3), 21.6 (CH3), 19.5 (CH2), 14.0 (CH3); *m/z* (CI) 385 (M+NH4)+, 294 (M-OBu)+; *m/z* calcd. for C19H33N2O4S (M+NH4)+, 385.2161; found, 385.2160.

*2,5-*trans *isomer:* νmax/cm-1 2961, 1713, 1344, 1158, 1098, 667; δH (250 MHz, CDCl3) 7.84-7.77 (2H, m, *o*-ArH), 7.28-7.22 (2H, m, *m*-ArH), 5.41 (1H, d, *J*5.5, CHOBu), 3.74 (1H, s, CHC(O)CH3), 3.52 (1H, dt, *J*9.2, 6.4, OCH2CH2), 3.35 (1H, dt, *J*9.2, 6.4, OCH2CH2), 2.41 (3H, s, ArCH3), 2.24 (3H, s, C(O)CH3), 2.02 (1H, dd, *J*13.4, 5.5, NCHCH2), 1.71 (1H, d, *J*13.4, NCHCH2), 1.54-1.40 (2H, m, alkyl-CH2), 1.34-1.15 (2H, m, alkyl-CH2), 1.09 (3H, s, C(CH3)2), 0.95 (3H, s, C(CH3)2), 0.87 (3H, t, *J*7.2, CH2CH3); δC (63 MHz, CDCl3) 208.4 (C), 143.2 (C), 137.5 (C), 129.0 (CH), 127.8 (CH), 91.3 (CH), 76.3 (CH), 68.5 (CH2), 44.2 (CH2), 41.6 (C), 31.7 (CH2), 29.9 (CH3), 28.4 (CH3), 24.2 (CH3), 21.5 (CH3), 19.2 (CH2), 13.8 (CH3); *m/z* (CI) 385 (M+NH4)+, 294 (M-OBu)+; *m/z* calcd. for C19H33N2O4S (M+NH4)+, 385.2161; found, 385.2156.

Structure of 2,5-*cis* isomer assigned by NOESY; key correlations shown below:

1-[2,5-*cis*-2,3-*trans*-5-Allyl-3-Isopropyl-1-tosyl-pyrrolidin-2-yl]-ethanone (9a)

Allylation of the 2,3-*trans* aminal using **Method D** and subsequent chromatography on silica with 25% EtOAc/petrol (Rf 0.45) gave pyrrolidine **9a** (83 mg, 95%) as a colourless oil; νmax/cm-1 2963, 1713, 1348, 1164, 1092, 667; δH (250 MHz, CDCl3) 7.74-7.68 (2H, m, *o*‑ArH), 7.36-7.30 (2H, m, *m*‑ArH), 5.90-5.71 (1H, m, CH=CH2), 5.16-5.11 (1H, m, CH=CH2), 5.10-5.06 (1H, m, CH=CH2), 3.72 (1H, dddd, *J*9.8, 7.7, 4.6, 2.1, NCHCH2CH=CH2), 3.62 (1H, d, *J*8.5, CHC(O)CH3), 2.74-2.61 (1H, m, CH2CH=CH2), 2.40-2.26 (1H, m, CH2CH=CH2), 2.43 (3H, s, ArCH3), 2.37 (3H, s, C(O)CH3), 2.16-2.02 (1H, m, CHCH(CH3)2), 1.62 (1H, ddd, *J*12.5, 6.6, 2.1, NCHCH2), 1.51-1.36 (1H, m, CH(CH3)2), 1.28-1.09 (1H, m, NCHCH2), 0.78 (3H, d, *J*6.7, CH(CH3)2), 0.62 (3H, d, *J*6.7, CH(CH3)2); δC (63 MHz, CDCl3) 208.7 (C), 144.1 (C), 134.4 (CH), 133.7 (C), 129.8 (CH), 127.7 (CH), 118.0 (CH2), 71.8 (CH), 60.7 (CH), 47.0 (CH), 41.0 (CH2), 30.9 (CH2), 28.1 (CH), 25.6 (CH3), 21.6 (CH3), 21.5 (CH3), 18.0 (CH3); *m/z* (CI) 367 (M+NH4)+, 350 (M+H)+; *m/z* calcd. for C19H28NO3S (M+H)+, 350.1790; found, 350.1798.

Structure assigned by NOESY – correlations shown below:

1-[2,5-*cis*-2,3-*trans*-5-Allyl-3-benzyloxymethyl-1-tosyl-pyrrolidin-2-yl]-ethanone (9b)

Allylation of the 2,3-*trans* aminal using **Method D** and subsequent chromatography on silica with 25% EtOAc/petrol (Rf 0.35) gave pyrrolidine **9b** (89 mg, 96%) as a colourless oil; νmax/cm-1 2862, 1712, 1346, 1163, 1092, 666; δH (250 MHz, CDCl3) 7.72-7.66 (2H, m, *o*‑ArH from Ts), 7.35-7.17 (7H, m, ArH), 5.88-5.70 (1H, m, CH=CH2), 5.16-5.11 (1H, m, CH=CH2), 5.08 (1H, br s, CH=CH2), 4.33 (2H, s, OCH2Ph­), 3.83 (1H, d, *J*7.9, CHC(O)CH3), 3.76-3.64 (1H, m, NCHCH2CH=CH2), 3.16 (2H, d, *J*5.8, CH2OBn), 2.75-2.62 (1H, m, CH2CH=CH2), 2.60-2.42 (1H, m, BnOCH2CH), 2.42-2.26 (1H, m, CH2CH=CH2), 2.41 (3H, s, ArCH3), 2.39 (3H, s, C(O)CH3), 1.76 (1H, ddd, *J*12.8, 6.7, 3.0, NCHCH2), 1.38 (1H, ddd, *J*12.8, 9.5, 8.2, NCHCH2); δC (63 MHz, CDCl3) 208.3 (C), 144.0 (C), 137.9 (C), 134.2 (CH), 133.8 (C), 129.8 (CH), 128.4 (CH), 127.8 (CH), 127.7 (CH), 127.5 (CH), 118.1 (CH2), 73.1 (CH2), 70.5 (CH), 69.6 (CH2), 60.8 (CH), 41.4 (CH), 40.9 (CH2), 32.5 (CH2), 26.1 (CH3), 21.6 (CH3); *m/z* (CI) 445 (M+NH4)+, 428 (M+H)+, 272 (M-Ts)+; *m/z* calcd. for C24H30NO4S (M+H)+, 428.1896; found, 428.1886.

Structure assigned by NOESY – correlations shown below:

1-[2,5-*cis*-5-allyl-3,3-Dimethyl-1-tosyl-pyrrolidin-2-yl]-ethanone (10)

Allylation of the 2,3-*trans* aminal using **Method D** and subsequent chromatography on silica with 25% EtOAc/petrol (Rf 0.35) gave pyrrolidine **10** (59 mg, 88%) as a colourless oil; νmax/cm-1 2965, 1711, 1348, 1162, 666; δH (250 MHz, CDCl3) 7.74-7.68 (2H, m, *o*‑ArH), 7.35-7.29 (2H, m, *m*-ArH), 5.80 (1H, ddt, *J*17.1, 10.1, 7.0, CH=CH2), 5.19-5.05 (2H, m, CH=CH2), 3.68 (1H, s, CHC(O)CH3), 3.56 (1H, dtd, *J*9.5, 8.0, 3.7, NCHCH2CH=CH2), 3.05 (1H, dddt, *J*13.7, 7.0, 3.7, 1.3, CH2CH=CH2), 2.60-2.45 (1H, m, CH2CH=CH2), 2.43 (3H, s, ArCH3), 2.27 (3H, s, C(O)CH3), 1.66 (2H, br d, *J*8.0, NCHCH2), 0.91 (3H, s, C(CH3)2), 0.50 (3H, s, C(CH3)2); δC (63 MHz, CDCl3) 208.6 (C), 144.0 (C), 134.3 (CH), 133.8 (C), 129.7 (CH), 127.7 (CH), 117.8 (CH2), 77.4 (CH), 59.8 (CH), 45.3 (CH2), 40.6 (C), 40.5 (CH2), 29.1 (CH3), 28.4 (CH3), 24.0 (CH3), 21.6 (CH3); *m/z* (CI) 353 (M+NH4)+, 336 (M+H)+, 292 (M-C(O)CH3)+; *m/z* calcd. for C18H29N2O3S (M+NH4)+, 353.1899; found, 353.1902.

Structure assigned by NOESY – strong correlations shown below:

1-[2,5-*trans*-2,3-*cis*-5-Allyl-3-isopropyl-1-tosyl-pyrrolidin-2-yl]-ethanone (11a)

Allylation of the 2,3-*cis* aminal using **Method D** and subsequent chromatography on silica with 25% EtOAc/petrol (Rf 0.45) gave pyrrolidine **11a** (72 mg, 77%) as a colourless oil, contaminated with a trace of the 2,5-*cis*-2,3-*trans* material carried through from the starting material; νmax/cm-1 2963, 1713, 1340, 1160, 1094, 673; δH (250 MHz, CDCl3) 7.70-7.63 (2H, m, *o*‑ArH), 7.32-7.25 (2H, m, *m*‑ArH), 5.56 (1H, dddd, *J*16.8, 10.4, 7.6, 6.6, CH=CH2), 5.05-4.93 (2H, m, CH=CH2), 4.37 (1H, d, *J*7.3, CHC(O)CH3), 4.18 (1H, dddd, *J*9.0, 8.2, 3.0, 1.2, NCHCH2CH=CH2), 2.56 (1H, dddd, *J*14.0, 6.6, 3.0, 1.5, CH2CH=CH2), 2.42 (3H, s, ArCH3), 2.26 (3H, s, C(O)CH3), 2.16-1.76 (4H, m, alkyl‑H), 1.37-1.18 (1H, m, CH(CH3)2), 1.01 (3H, d, *J*6.4, CH(CH3)2), 0.81 (3H, d, *J*6.7, CH(CH3)2); δC (63 MHz, CDCl3) 208.7 (C), 143.4 (C), 137.9 (C), 134.2 (CH), 129.6 (CH), 127.1 (CH), 118.0 (CH2), 69.7 (CH), 59.3 (CH), 49.0 (CH), 38.8 (CH2), 32.9 (CH2), 29.7 (CH3), 28.1 (CH), 22.5 (CH3), 21.5 (CH3), (1 x iPr-CH3 not seen); *m/z* (CI) 367 (M+NH4)+, 350 (M+H)+; *m/z* calcd. for C19H28NO3S (M+H)+, 350.1790; found, 350.1790.

Structure assigned by NOESY (taken in C6D6 to separate signals) – strong correlations shown below:

1-[2,5-*trans*-2,3-*cis*-5-Allyl-3-benzyloxymethyl-1-tosyl-pyrrolidin-2-yl]-ethanone (11b)

Allylation of the 2,3-*trans* aminal using **Method D** and subsequent chromatography on silica with 25% EtOAc/petrol (Rf 0.35) gave pyrrolidine **11b** (25 mg, 99%) as a colourless oil in an inseparable 6:1 mixture of the indicated isomer and the 2,5-*cis*-2,3-*cis* isomer; νmax/cm-1 2866, 1722, 1338, 1158, 1091, 670; δH (250 MHz, CDCl3) 7.74-7.64 (2Hboth isomers, m, *o*‑ArH from Ts), 7.40-7.22 (7Hboth isomers, m, ArH), 5.87-5.69 (1Hminor isomer, m, CH=CH2), 5.54 (1Hmajor isomer, dddd, *J*17.1, 10.4, 7.3, 6.7, CH=CH2), 5.19-5.04 (2Hminor isomer, m, CH=CH2), 5.04-4.91 (2Hmajor isomer, m, CH=CH2), 4.61 (1Hmajor isomer, d, *J*7.9, CHC(O)CH3), 4.42 (1Hmajor isomer, d, *J*11.7, OCH2Ph, AB­), 4.41 (1Hmajor isomer, d, *J*11.7, OCH2Ph, AB), 4.32 (2Hminor isomer, s, OCH2Ph), 4.23 (1Hminor isomer, d, *J*8.8, CHC(O)CH3), 4.10 (1Hmajor isomer, td, *J*8.9, 3.0, NCHCH2CH=CH2), 3.54-3.48 (1Hminor isomer, m, CH2OBn), 3.44 (1Hmajor isomer, dd, *J*9.8, 4.6, CH2OBn), 3.37-3.31 (1Hminor isomer, m, CH2OBn), 3.22 (1Hmajor isomer, t, *J*9.8, CH2OBn), 3.02-2.90 (1Hminor isomer, m, alkyl-H), 2.87-2.64 (1Hmajor isomer, m, CHCH2OBn), 2.58-2.45 (1Hboth isomers, m, alkyl-H), 2.43 (3Hminor isomer, s, ArCH3), 2.42 (3Hmajor isomer, s, ArCH3), 2.30 (3Hboth isomers, s, C(O)CH3), 2.18-1.90 (2Hboth isomers, m, alkyl-H), 1.74-1.64 (1Hboth isomers, m, alkyl-H); δC (63 MHz, CDCl3) *major diastereoisomer* 209.0 (C), 143.3 (C), 137.8 (C), 137.3 (C), 134.0 (CH), 129.5 (CH), 128.5 (CH), 127.94 (CH), 127.87 (CH), 127.2 (CH), 118.1 (CH2), 73.5 (CH2), 68.7 (CH2), 68.2 (CH), 58.8 (CH), 41.1 (CH), 38.7 (CH2), 30.8 (CH2), 29.9 (CH3), 21.5 (CH3); *m/z* (CI) 445 (M+NH4)+, 428 (M+H)+, 272 (M‑Ts)+; *m/z* calcd. for C24H30NO4S (M+H)+, 428.1896; found, 428.1893.

Structure of the major isomer assigned by NOESY – strong correlations shown below:

**X-ray structure determination of compound 6**

We thank Dr. A.J.P. White, Department of Chemistry, Imperial College London, for this structure determination.

**AA0304b (6)**

*Crystal data for* **6**: C12H20O4, *M* = 309.41, orthorhombic, *Pbca* (no. 61), *a* = 7.224(3), *b* = 14.064(6), *c* = 32.806(11) Å, *V* = 3333(2) Å3, *Z* = 8, *D*c = 1.233 g cm–3, (Cu-K) = 1.802 mm–1, *T* = 293 K, colourless platy needles; 2456 independent measured reflections, *F*2 refinement, *R*1 = 0.072, *wR*2 = 0.167, 1893 independent observed reflections [|*F*o| > 4(|*F*o|), 2max = 120°], 241 parameters. CCDC 227678.


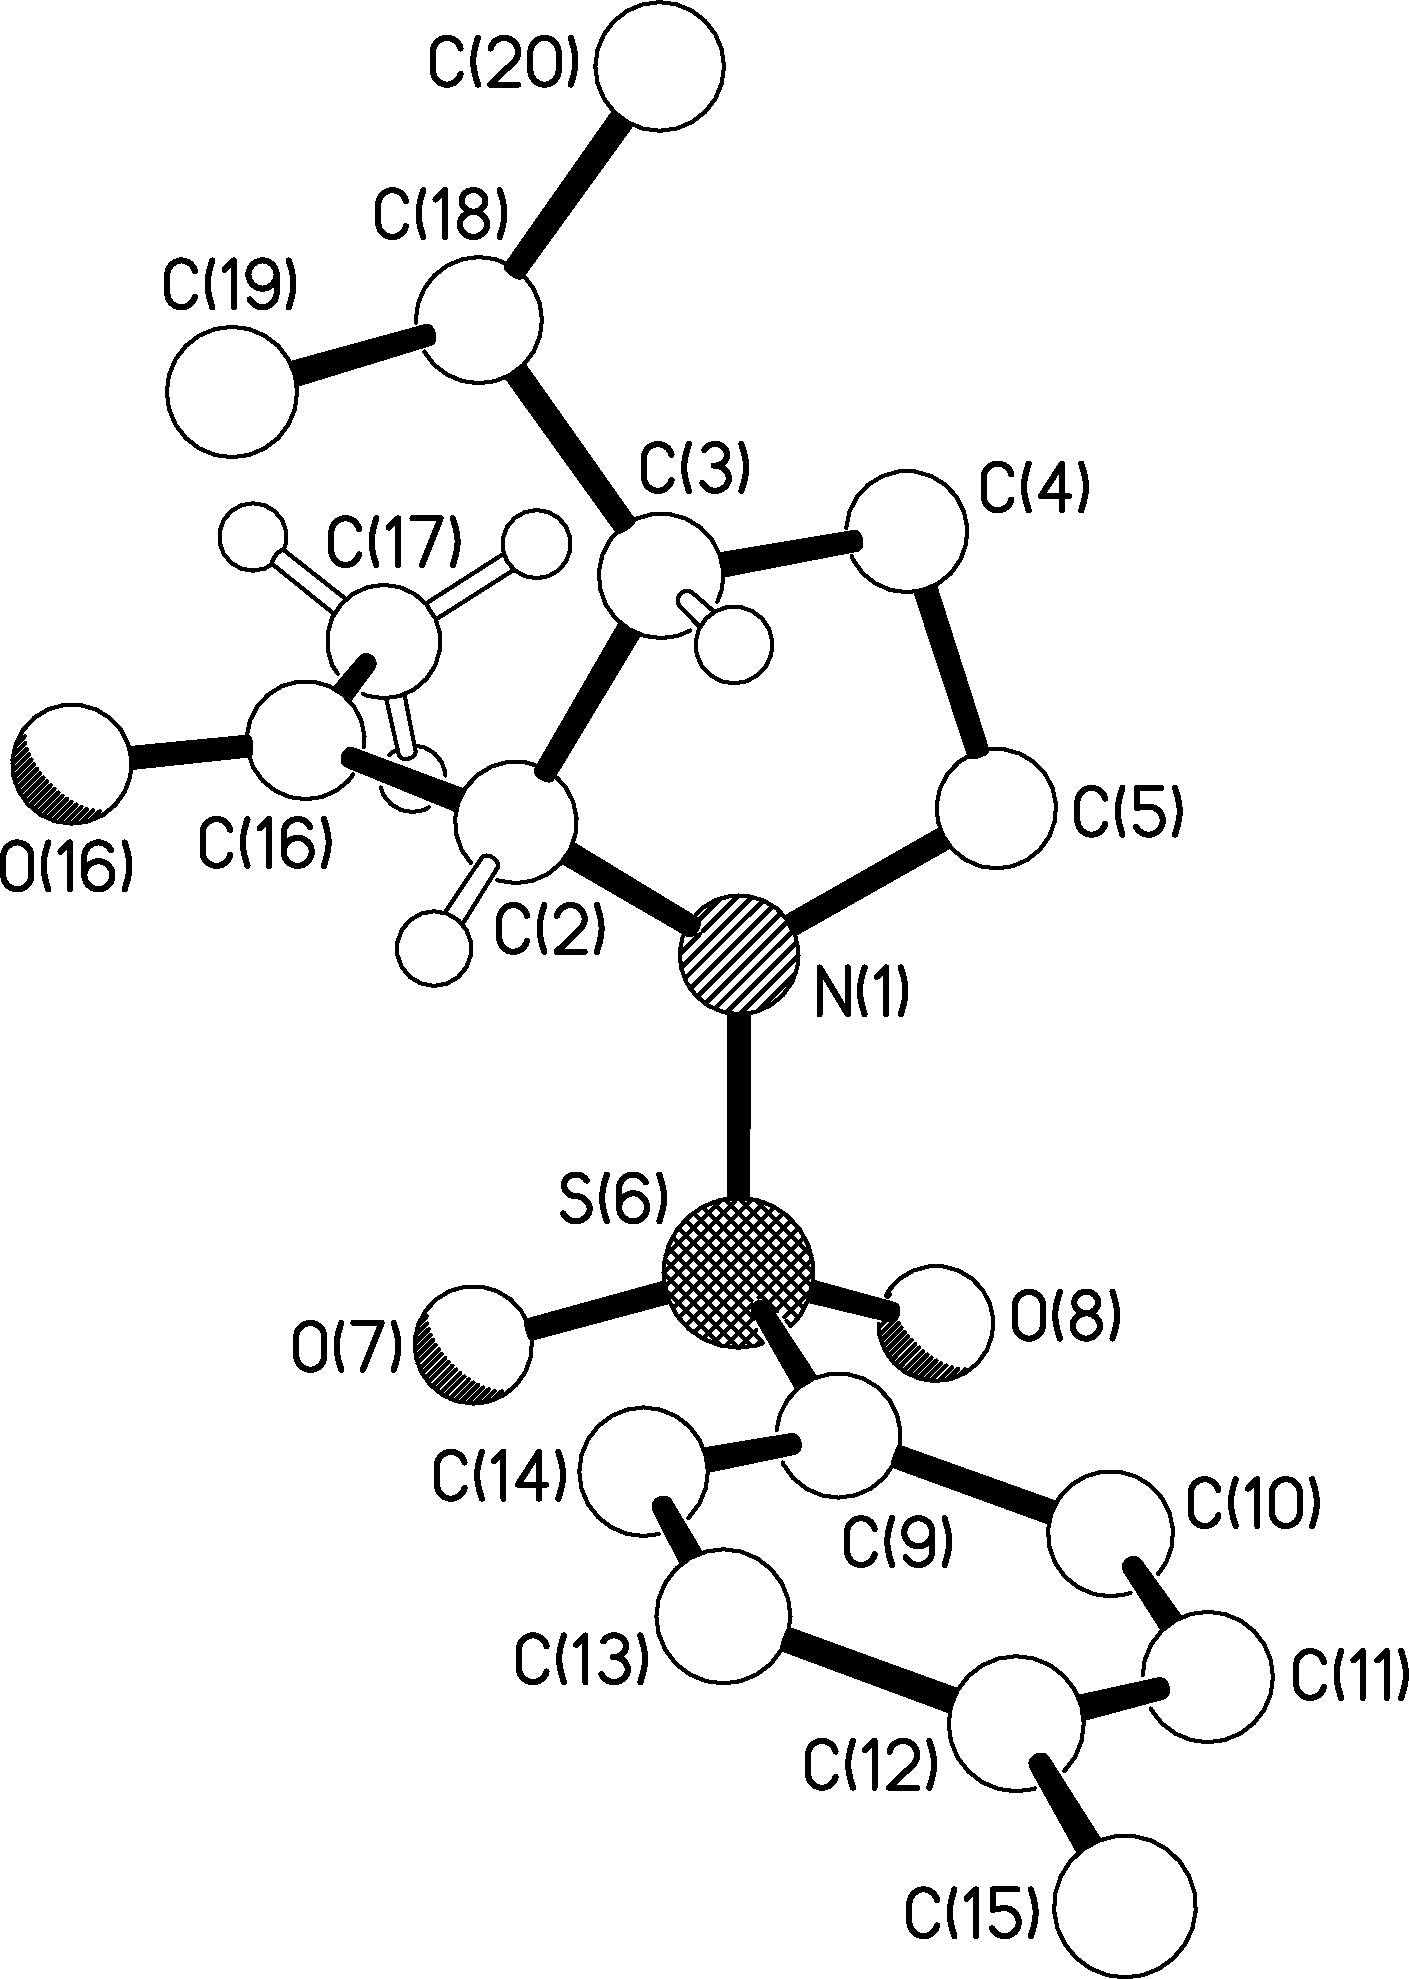


References

1. S. Danishefsky and M. Bednarski, *Tetrahedron Lett*., 1984, **25**, 721.
2. J.U. Jeong, B. Tao, I. Sagasser, H. Henniges and K.B. Sharpless, *J. Am. Chem. Soc*., 1998, **120**, 6844.
3. S. Taylor, J. Gullick, P. McMorn, D. Bethell, P.C. Bulman Page, F.E. Hancock, F. King and G.J. Hutchings., *J. Chem. Soc., Perkin Trans. 2*, 2001, 1714.
